# Supplementary material for: Association between Plasma Trace Element Concentrations in Early Pregnancy and Gestational Diabetes Mellitus in Shanghai, China
Source: MDPI journal article supplement (doi:10.3390/nu15010115), 2022-12-27
Supplement: s1 [file s1]

**Association between plasma trace elements concentrations in early pregnancy and gestational diabetes mellitus in Shanghai, China**

Ting Wu<sup>1,2</sup> †, Tao Li<sup>1,2</sup> †, Chen Zhang<sup>1,2</sup>, Hefeng Huang<sup>1,2,3,4,5\*\*</sup>, Yanting Wu<sup>3,4\*</sup>

Affiliations:

1 The International Peace Maternity and Child Health Hospital, School of Medicine, Shanghai Jiao Tong University, Shanghai 200030, China

2 Shanghai Key Laboratory of Embryo Original Diseases, Shanghai 200030, China

3 Obstetrics and Gynecology Hospital, Institute of Reproduction and Development, Fudan University, Shanghai, China.

4 Research Units of Embryo Original Diseases, Chinese Academy of Medical Sciences, Shanghai 200030, China

5 Women's Hospital, School of Medicine, The Key Laboratory of Reproductive Genetics, Ministry of Education (Zhejiang University), Hangzhou 310058, China

† Ting Wu and Tao Li contributed equally to this work.

**\* Correspondence:**

Yan-Ting Wu,

Obstetrics and Gynecology Hospital, Fudan University, No. 419, Fangxie Rd., Shanghai, 200000, China,

E-mail: [yanting\\_wu@163.com](mailto:yanting_wu@163.com),

Tel: +86-21-33189900;

ORCID: 0000-0002-2293-1792

He-Feng Huang,

Obstetrics and Gynecology Hospital, Fudan University, No. 419, Fangxie Rd., Shanghai, 200000, China,

Email: [huanghefg@sjtu.edu.cn](mailto:huanghefg@sjtu.edu.cn) ,

Tel: 86-21-64070434,

ORCID: 0000-0003-4344-8019

**TableS1.Profiling of trace elements in maternal plasma(n=1166)**

**TableS2.Level of glucose and lipid metabolism indices**

TableS1. Profiling of trace elements in maternal plasma (n= 1166)

| Elements (µg/L) | LOD    | Percent of detection | Mean   | Minimum | Percentile |        |        | Maximum |
|-----------------|--------|----------------------|--------|---------|------------|--------|--------|---------|
|                 |        |                      |        |         | 25th       | 50th   | 75th   |         |
| Vanadium        | 0.0119 | 1157 (99.23%)        | 7.44   | 0.169   | 3.71       | 6.25   | 9.06   | 112.81  |
| Chromium        | 0.3059 | 1166 (100%)          | 407.27 | 34.301  | 250.75     | 372.40 | 531.44 | 1217.98 |
| Manganese       | 0.0076 | 1131 (97.00%)        | 6.90   | 0.587   | 3.51       | 5.79   | 8.90   | 127.69  |
| Cobalt          | 0.0125 | 1166 (100%)          | 64.84  | 0.177   | 40.24      | 56.82  | 81.94  | 301.02  |
| Nickle          | 0.0092 | 1021 (87.56%)        | 38.80  | 2.641   | 17.34      | 30.67  | 48.58  | 1019.21 |
| Selenium        | 0.3063 | 1161 (99.57%)        | 96.96  | 4.333   | 60.33      | 87.80  | 120.72 | 324.82  |

LOD: Limit of detection

TableS2. Level of glucose and lipid metabolism indices

|                          | Total (n= 1166)  | Non-GDM (n= 763) | GDM (n= 403)       | <i>p</i>  |
|--------------------------|------------------|------------------|--------------------|-----------|
| FPG (mmol/L)             | 4.67 (4.38-5.04) | 4.49 (4.27-4.71) | 5.19 (4.89-5.45)   | <0.001*** |
| OGTT-1h                  | 8.11 (7.12-9.51) | 7.70 (6.64-8.45) | 10.04 (8.52-10.84) | <0.001*** |
| OGTT-2h                  | 6.79 (5.99-7.80) | 6.45 (5.71-7.09) | 8.10 (6.93-8.97)   | <0.001*** |
| FPI (µU/mL)              | 6.70 (4.80-8.90) | 6.40 (4.50-8.30) | 7.30 (5.60-9.90)   | <0.001*** |
| HOMA-IR                  | 1.42 (0.98-1.92) | 1.26 (0.88-1.69) | 1.69 (1.30-2.31)   | <0.001*** |
| HbA1c, %                 | 5.30 (5.10-5.43) | 5.30 (5.10-5.40) | 5.30 (5.20-5.50)   | <0.001*** |
| CHOL (mmol/L)            | 4.46 (3.98-4.96) | 4.40 (3.93-4.93) | 4.53 (4.10-4.99)   | <0.001*** |
| TG (mmol/L)              | 1.31 (1.06-1.64) | 1.26 (1.02-1.60) | 1.41 (1.14-1.78)   | 0.003**   |
| LDL cholesterol (mmol/L) | 2.47 (2.09-2.86) | 2.43 (2.04-2.82) | 2.54 (2.16-2.95)   | <0.001*** |
| HDL cholesterol (mmol/L) | 1.89 (1.65-2.16) | 1.90 (1.67-2.20) | 1.87 (1.62-2.11)   | 0.008**   |
| APO-A (mmol/L)           | 1.77 (1.68-1.87) | 1.77 (1.67-1.87) | 1.79 (1.69-1.87)   | 0.116     |
| APO-B (mmol/L)           | 0.80 (0.71-0.90) | 0.79 (0.70-0.89) | 0.82 (0.73-0.90)   | 0.001**   |

FPG: fasting plasma glucose; OGTT, oral glucose tolerance test; FPI: fasting plasma insulin; HOMA-IR, homeostasis model of assessment-insulin resistance; HbA1c: glycosylated Hemoglobin; \*P < 0.05, \*\* P < 0.01, \*\*\*P < 0.001.
