# Supplementary figures and images for: Association between Plasma Trace Element Concentrations in Early Pregnancy and Gestational Diabetes Mellitus in Shanghai, China
Source: MDPI journal article supplement (doi:10.3390/nu15010115), 2022-12-27

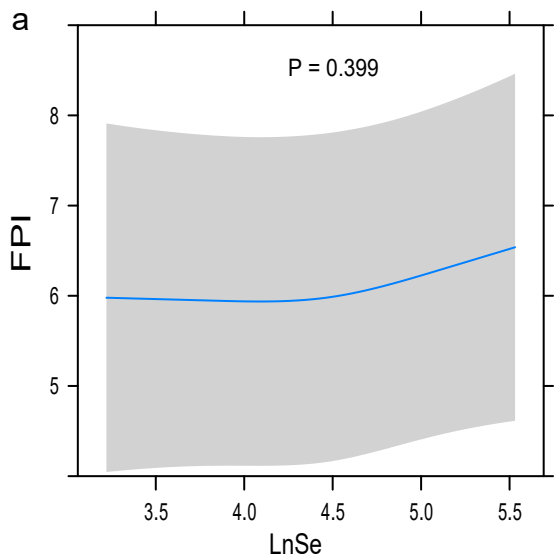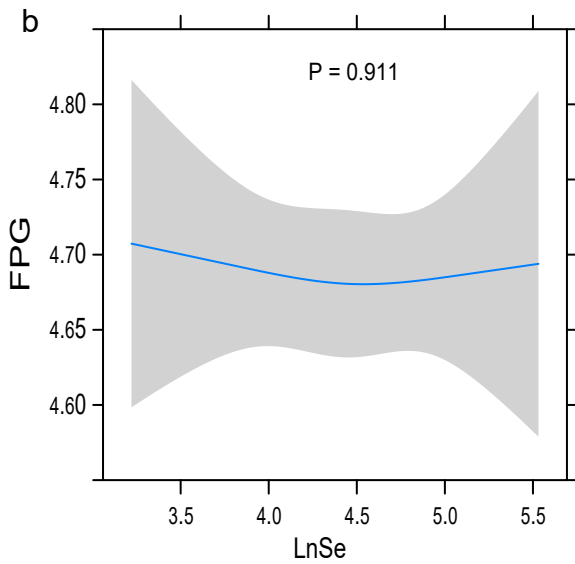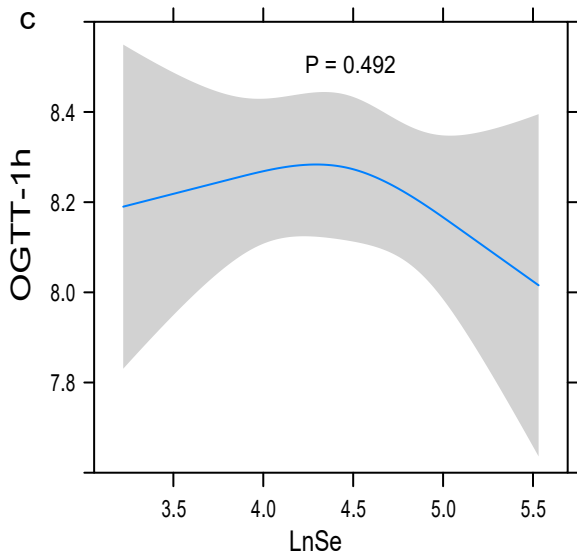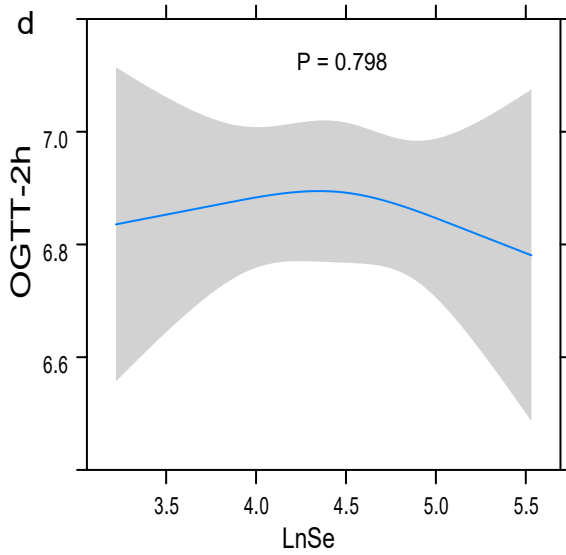

Supplement: s1 [file s1]

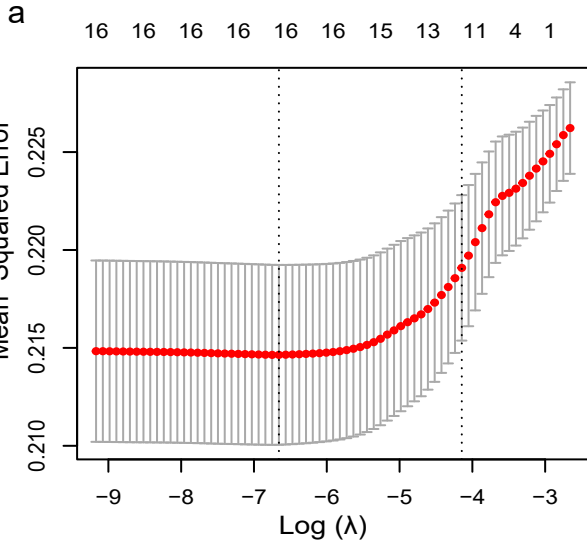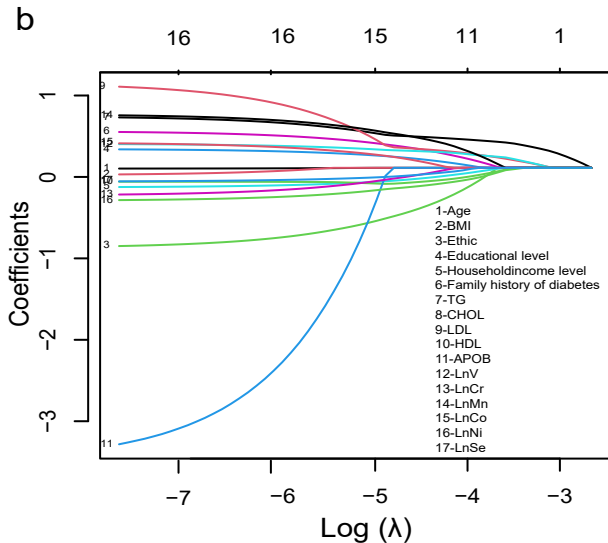

Supplement: s1 [file s1]

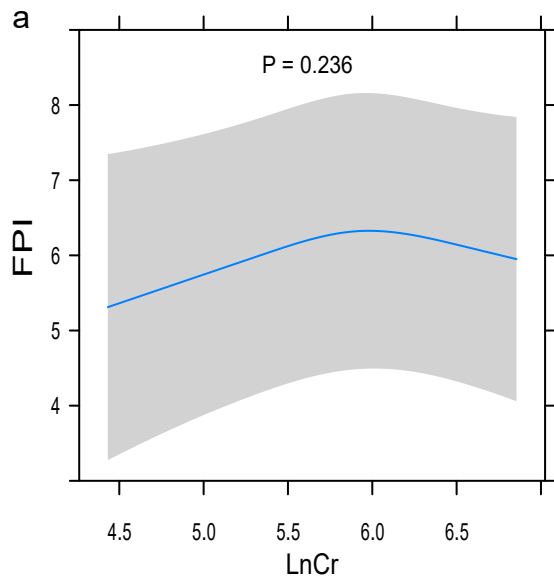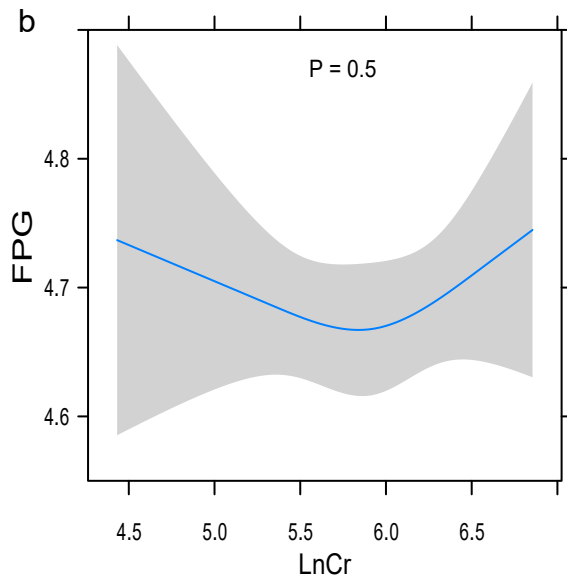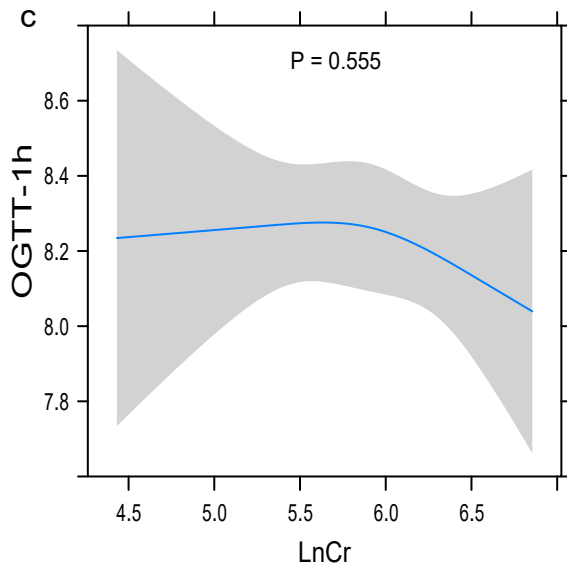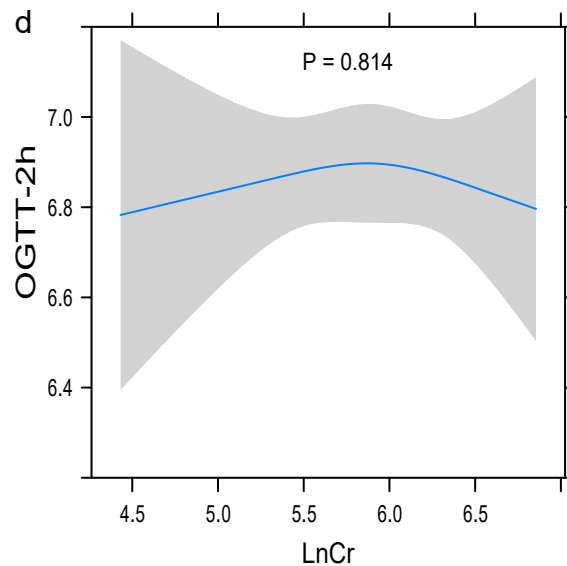

Supplement: s1 [file s1]

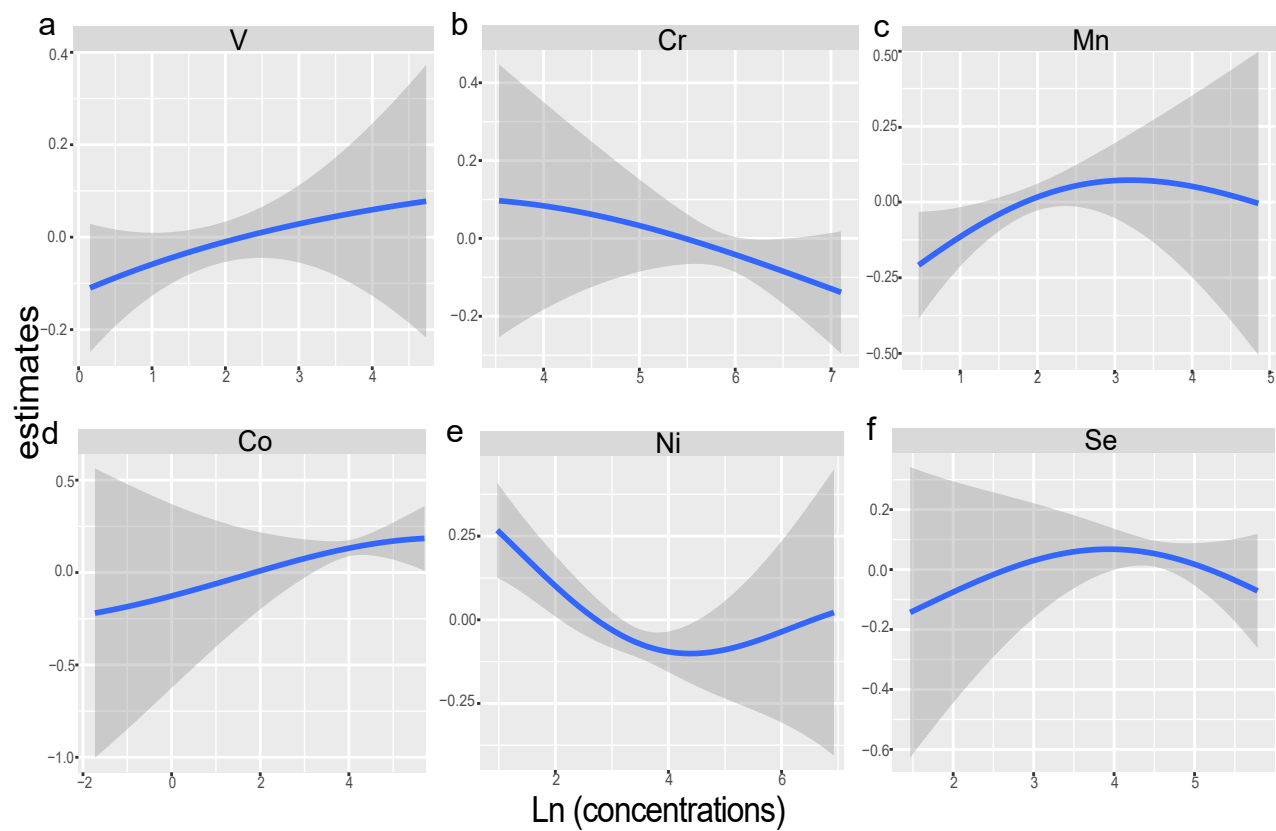

Supplement: s1 [file s1]

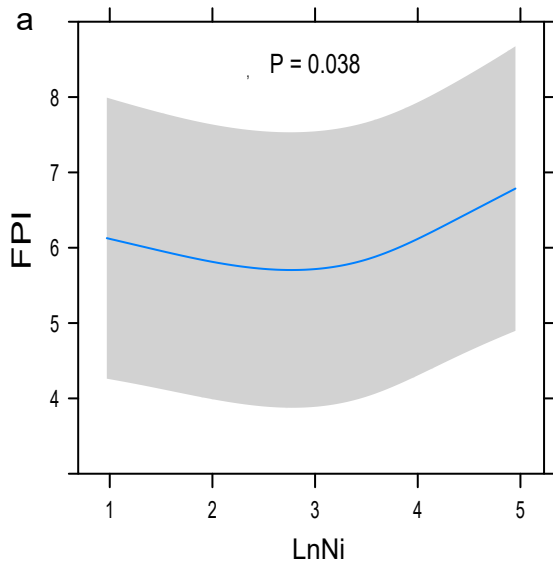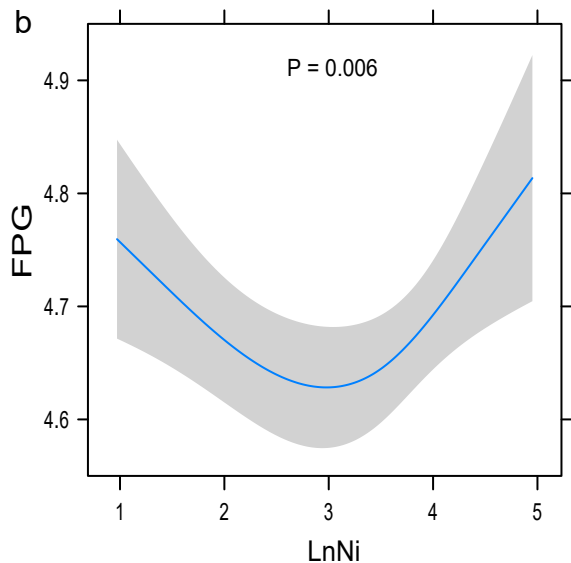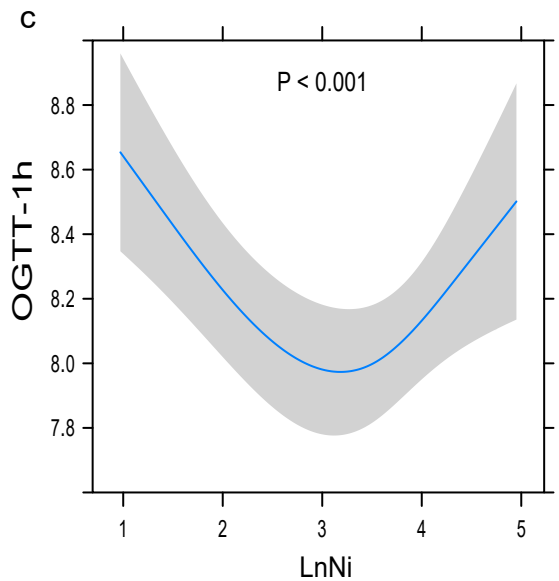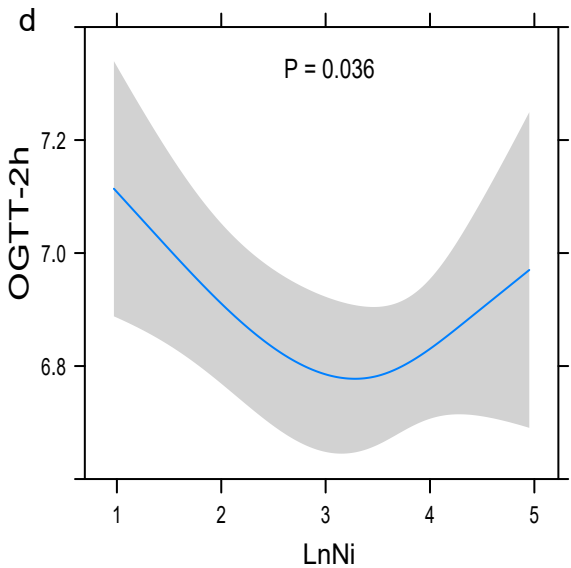

Supplement: s1 [file s1]

$h(\text{expos1} - \text{quantile of expos2})$

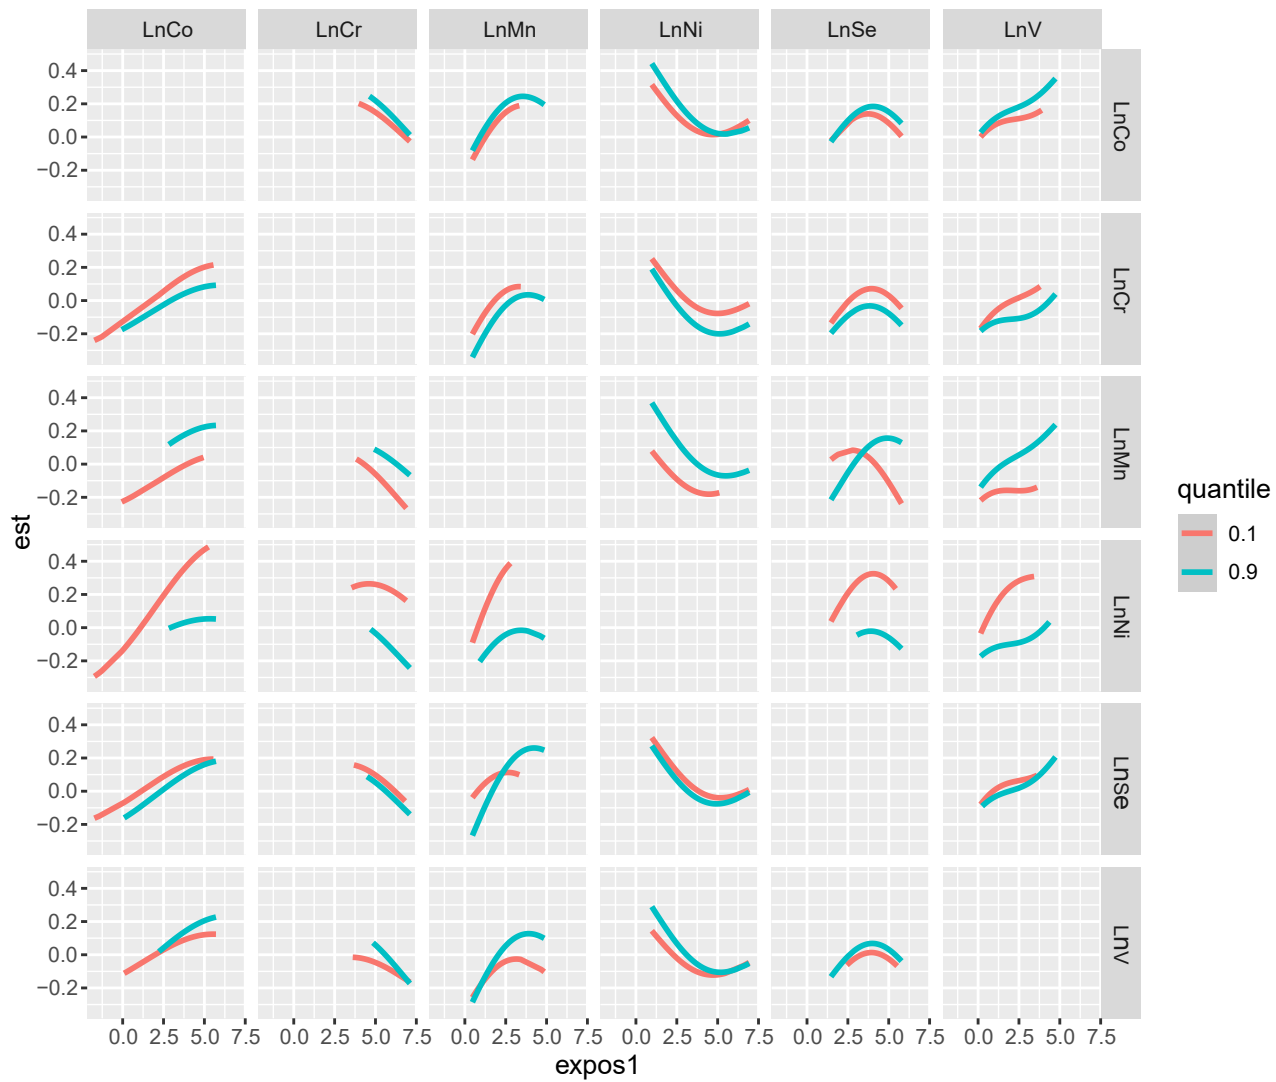

Supplement: s1 [file s1]

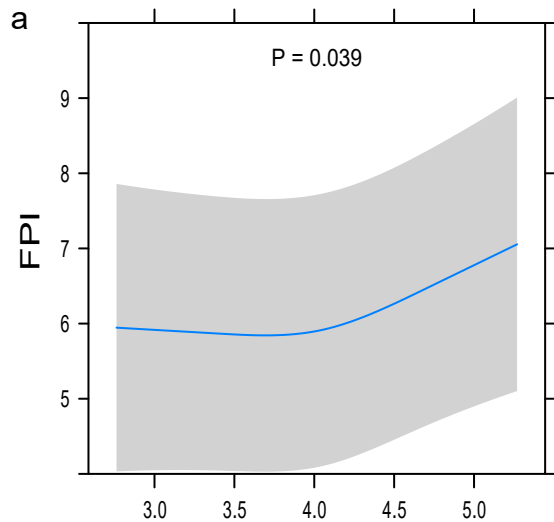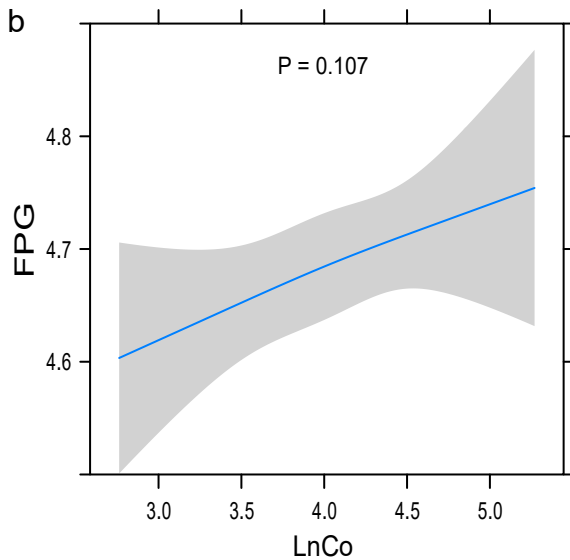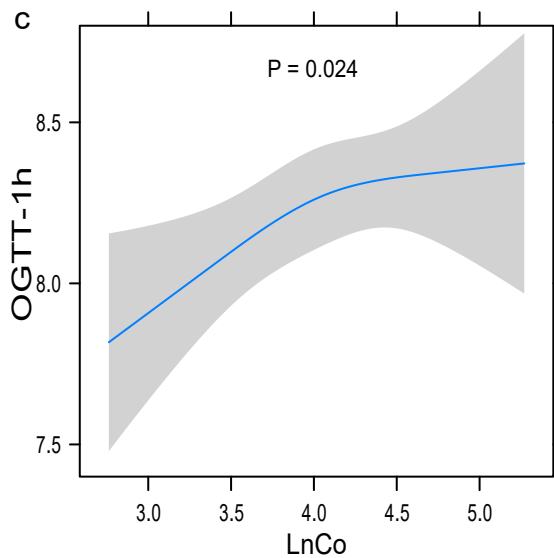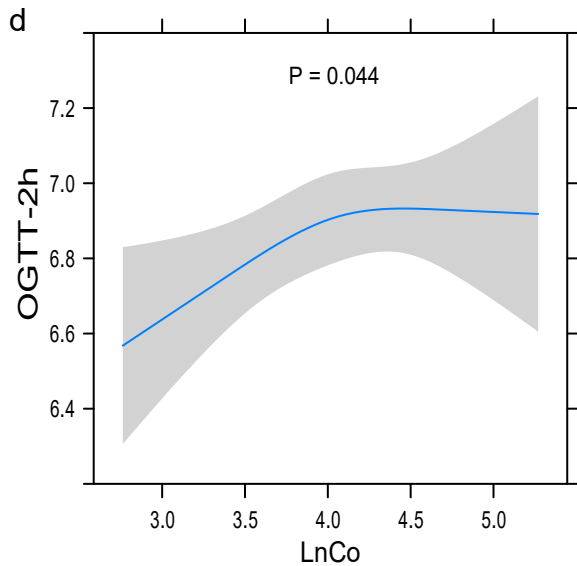

Supplement: s1 [file s1]

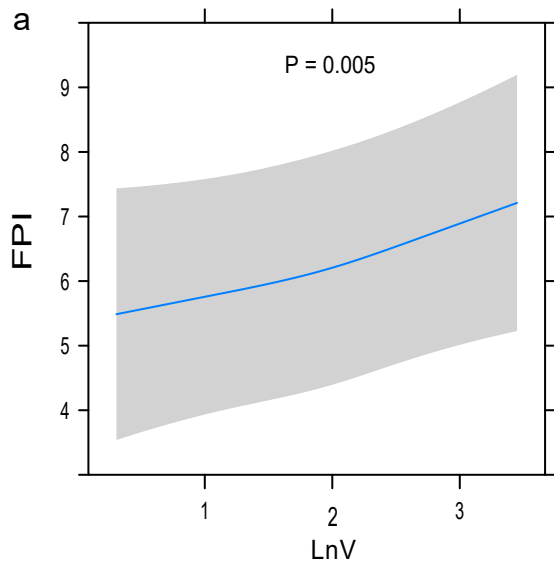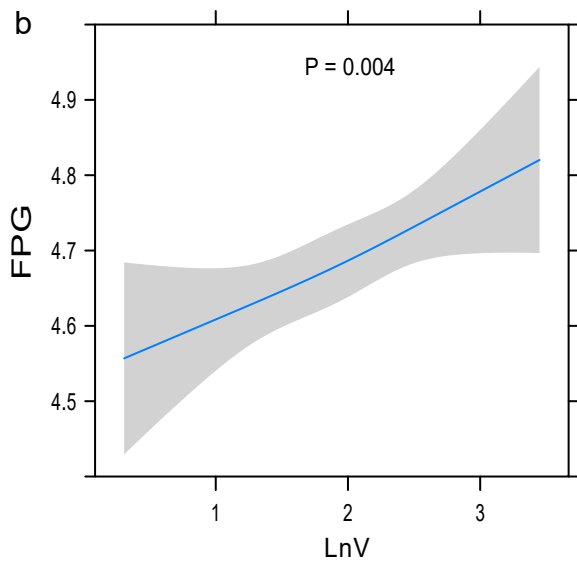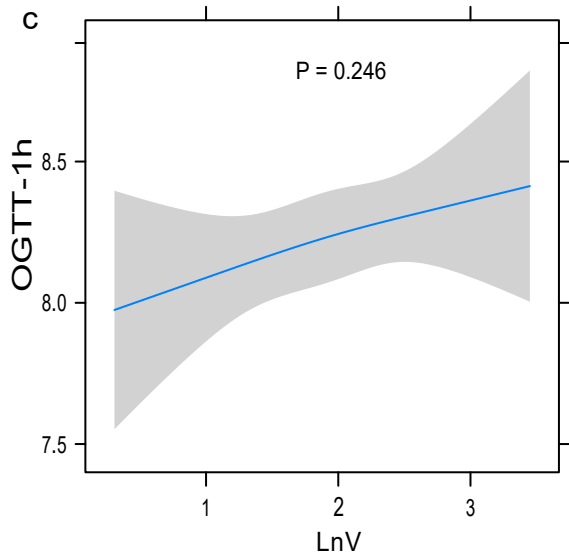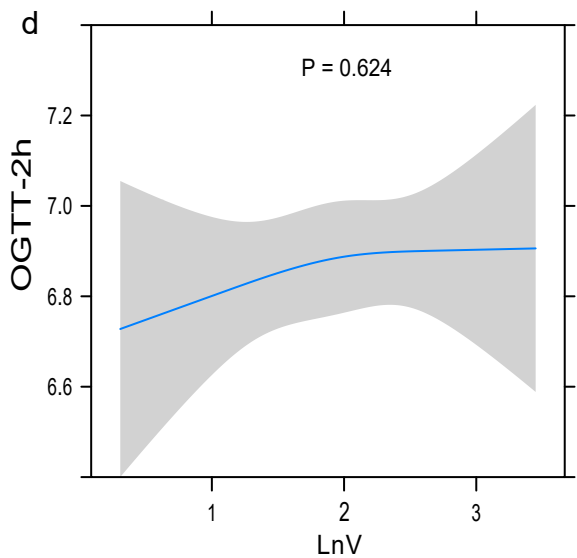

Supplement: s1 [file s1]

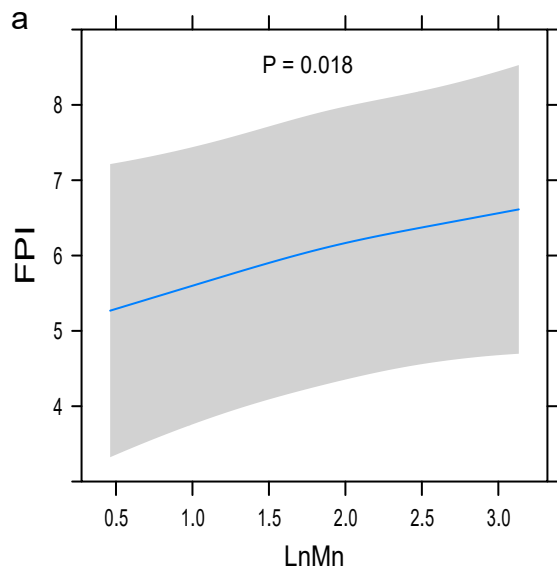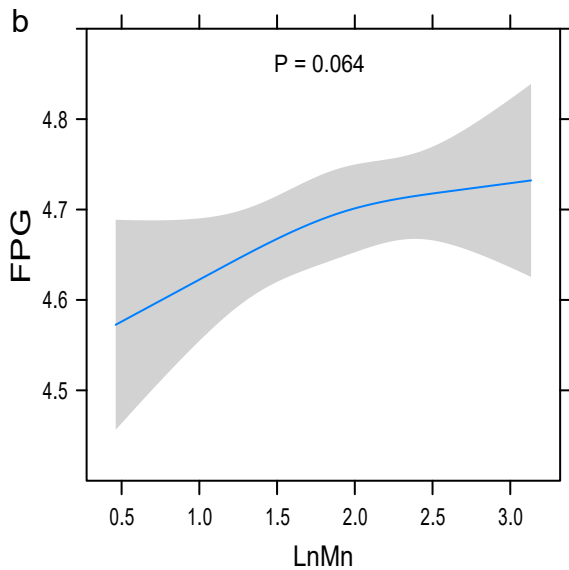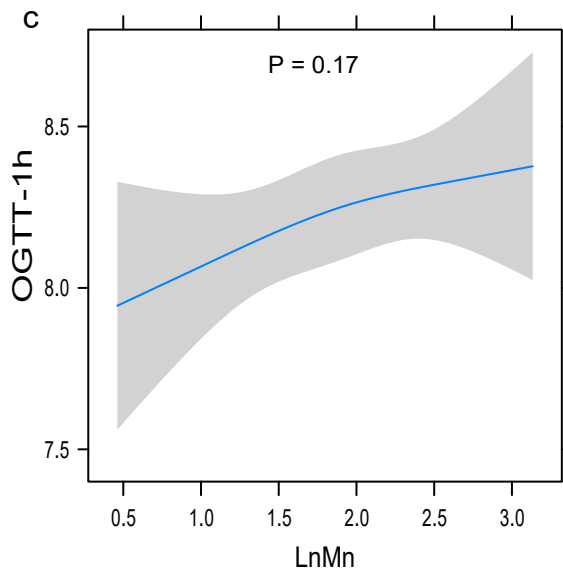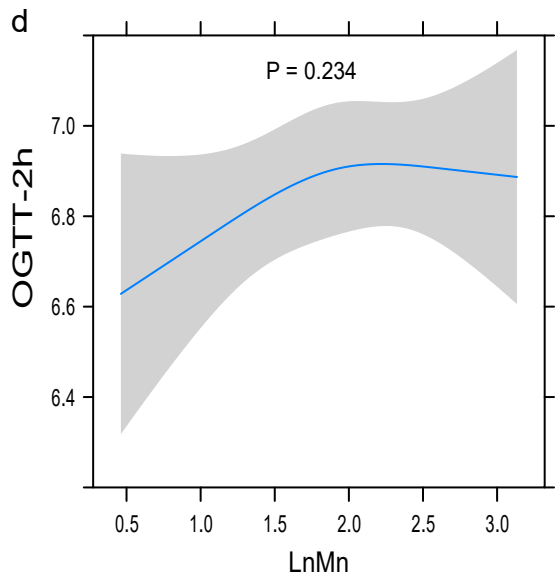

Supplement: s1 [file s1]

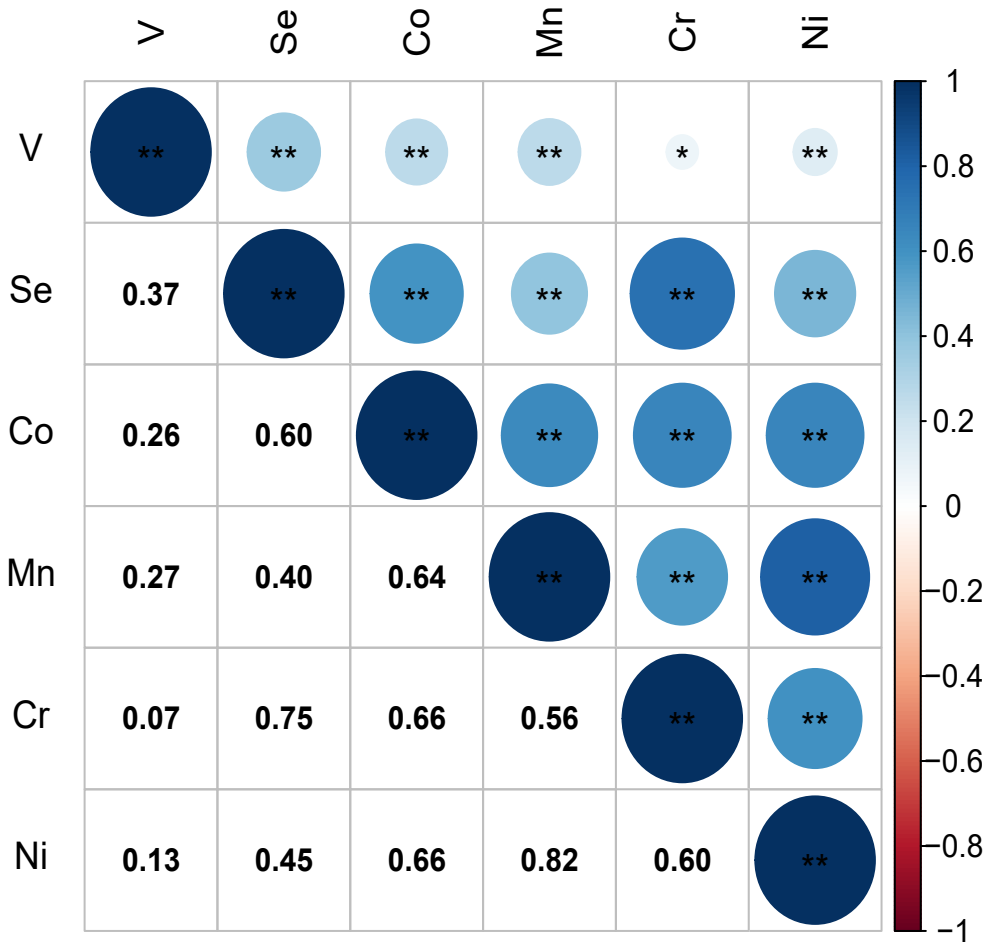

Supplement: s1 [file s1]
